# Supplementary material
Source: MDPI journal article supplement (https://www.mdpi.com/2673-9992/12/1/16)
Supplement: s1 [file s1]

# Resveratrol, a novel inhibitor of the NorA efflux pump and resistance modulator in *Staphylococcus aureus*

Madalena Santos<sup>1</sup>, Raquel Santos<sup>1</sup>, Susana Ferreira<sup>1</sup>

<sup>1</sup>CICS-UBI-Health Sciences Research Centre, University of Beira Interior, Avenida Infante D. Henrique, 6200-506, Covilhã, Portugal

## Introduction

- Among the bacterial resistance mechanisms, the active efflux pumps play a role in the extrusion of different molecules, and thus contribute for antimicrobial resistance [1].
- S. aureus* is a Gram-positive bacterium that can present resistance to various antibiotics, for which NorA, a predominant efflux pump of these strains, is known to promote resistance to fluoroquinolones [2].
- Thus, the inhibition of this efflux pump may modulate resistance in *S. aureus*, namely to fluoroquinolones [3].
- This study aimed to investigate the ability of a natural compound, resveratrol (RSV), to modulate fluoroquinolones resistance in *S. aureus*.

## Methods

Antimicrobial Activity

Modulation Assay

Ethidium Bromide Accumulation Assay

Impact on Frequency of Resistance

Post-antibiotic Effect (PAE)

## Results

**Table 1** - Minimum inhibitory concentrations (MIC) of RSV, Norfloxacin (Nor) and ethidium bromide (EtBr) against the *S. aureus* strains.

| Bacterial Strains        | MIC (µg/mL) |       |      |
|--------------------------|-------------|-------|------|
|                          | RSV         | Nor   | EtBr |
| SA1199 (wildtype)        | 200         | 0.25  | 2    |
| SA1199B (norA++)         | 100         | 32    | 16   |
| 8325-4 (wildtype)        | 400         | 0.25  | 2    |
| SAK1758 ( $\Delta$ norA) | 200         | 0.125 | 0.25 |

**Table 2** - Modulation of antimicrobial activity of Nor and EtBr in absence and presence of RSV (at ¼ MIC) against *S. aureus* strains.

| Bacterial Strains        | MIC (µg/mL) |         |           |          |
|--------------------------|-------------|---------|-----------|----------|
|                          | Nor         | Nor+RSV | EtBr      | EtBr+RSV |
| SA1199 (wildtype)        | 0.25 (2*)   | 0.125   | 2 (4*)    | 0.5      |
| SA1199B (norA++)         | 32 (16*)    | 2       | 16 (8*)   | 2        |
| 8325-4 (wildtype)        | 0.25 (2*)   | 0.125   | 2 (32*)   | 0.0625   |
| SAK1758 ( $\Delta$ norA) | 0.125 (1*)  | 0.125   | 0.25 (4*) | 0.0625   |

\* Fold reduction in MIC.

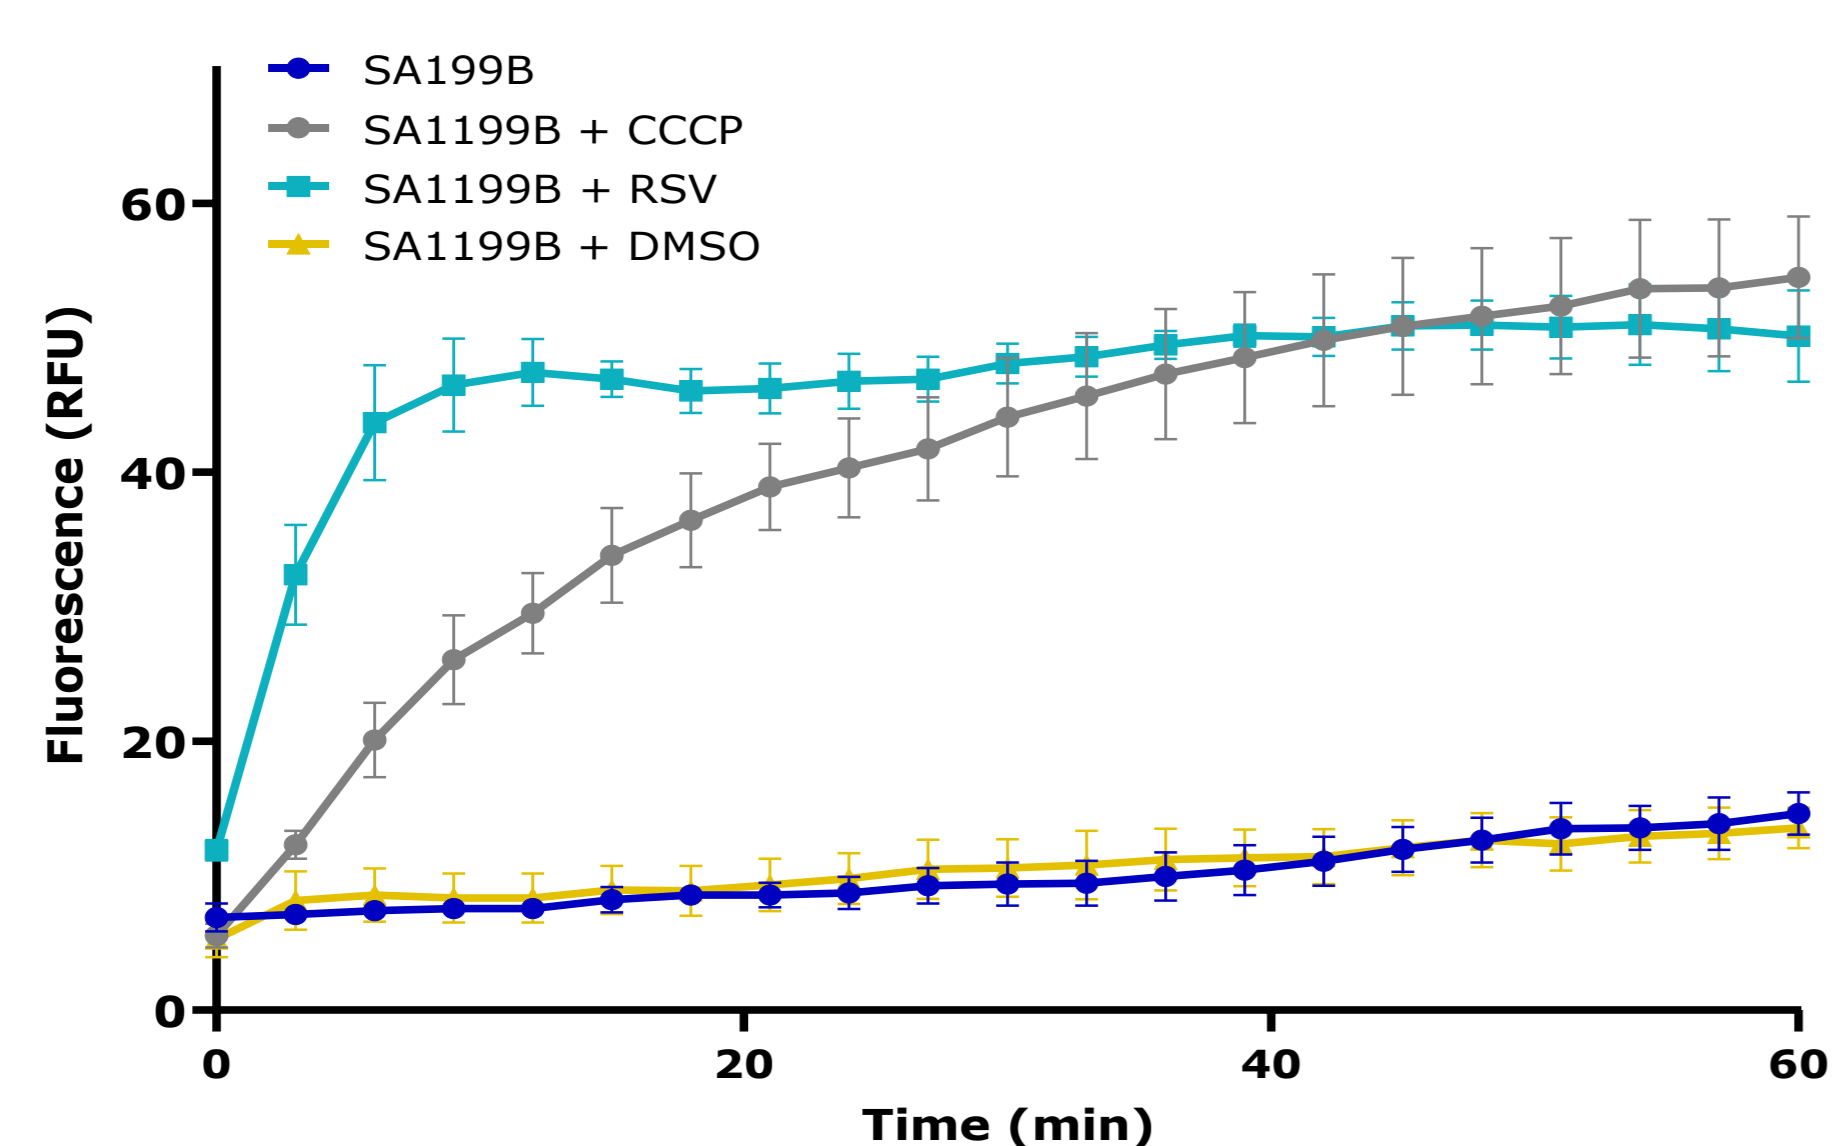

**Fig. 1** - Effect of RSV on intracellular accumulation of EtBr, in *S. aureus* SA1199B (norA++).

- The MIC of Nor and EtBr against *S. aureus* strains decreased when in presence of RSV.
- In the presence of RSV, the norA++ strain had an augmented fluorescence, consequence of the accumulation of EtBr.

**Table 3** - Mutation frequency of *S. aureus* SA1199.

| Resveratrol (µg/mL) | Mutation frequency with norfloxacin |                       |                          |
|---------------------|-------------------------------------|-----------------------|--------------------------|
|                     | 4 x MIC (1µg/mL)                    | 8 x MIC (2µg/mL)      | 16 x MIC (4µg/mL)        |
| 0                   | $1.87 \times 10^{-5}$               | $5.27 \times 10^{-7}$ | $4.03 \times 10^{-8}$    |
| 50                  | $2.16 \times 10^{-7}$               | $1.93 \times 10^{-8}$ | $< 5.31 \times 10^{-10}$ |

**Table 4** - PAE of Nor alone and in combination with RSV against *S. aureus* SA1199B.

| Regimen              | Mean PAE (h) ± SD       |                         |                    |
|----------------------|-------------------------|-------------------------|--------------------|
|                      | 0.25x MIC Nor (8 µg/mL) | 0.5x MIC Nor (16 µg/mL) | MIC Nor (32 µg/mL) |
| Nor                  | $2.19 \pm 0.25$         | $2.24 \pm 0.22$         | $2.65 \pm 0.18$    |
| Nor + RSV (25 µg/mL) | $2.83 \pm 0.10$         | $2.80 \pm 0.24$         | $3.02 \pm 0.04$    |

- There was a decrease in mutation prevention concentration of Nor when combined with RSV.
- The combination of Nor at 32 mg/L with RSV showed a most extended PAE than the antibiotic alone.

## Conclusion

Our findings demonstrated that resveratrol could modulate the norfloxacin-resistance, by inhibition of NorA, increasing the effectiveness of this antibiotic against *S. aureus*.

## References

- N. P. Kalia et al., J. Antimicrob. Chemother., vol. 67, no. 10, pp. 2401–2408, 2012, doi: 10.1093/jac/dks232.
- D. Muniz, C. Barbosa, I. de Menezes, E. de Sousa, R. Pereira et al., Food Chem., vol. 337, pp. 127776, 2021, doi: 10.1016/j.foodchem.2020.127776.
- D. Hwang and Y.-H. Lim, FEMS Microbiol. Lett., vol. 366, Feb. 2019, doi: 10.1093/femsle/fnz030.

## Acknowledgments

This work was developed within the scope of the CICS-UBI projects UIDB/00709/2020 and UIDP/00709/2020, financed by national funds through the Portuguese Foundation for Science and Technology/MCTES.
